# Supplementary material for: Comprehensive and accurate tracking of carbon origin of LC-tandem mass spectrometry collisional fragments for 13C-MFA
Source: PubMed Central journal article supplement (PMC5477699; doi:10.1007/s00216-016-0174-9), 2017-01-23
Supplement: 216_2016_174_MOESM1_ESM.pdf [file 216_2016_174_MOESM1_ESM.pdf]

## **Analytical and Bioanalytical Chemistry**

### **Electronic Supplementary Material**

#### **Comprehensive and accurate tracking of carbon origin of LC-tandem mass spectrometry collisional fragments for $^{13}\text{C}$ -MFA**

Jannick Kappelmann, Bianca Klein, Petra Geilenkirchen, Stephan Noack

216\_2016\_174\_MOESM2\_ESM.pdf

216\_2016\_174\_MOESM3\_ESM.tar
